# Supplementary material for: KMT5A-methylated SNIP1 promotes triple-negative breast cancer metastasis by activating YAP signaling
Source: PubMed Central journal article supplement (PMC9023492; doi:10.1038/s41467-022-29899-w), 2022-04-21
Supplement: 41467_2022_29899_MOESM1_ESM.pdf [file 41467_2022_29899_MOESM1_ESM.pdf]

## Supplementary Figure and Figure legends

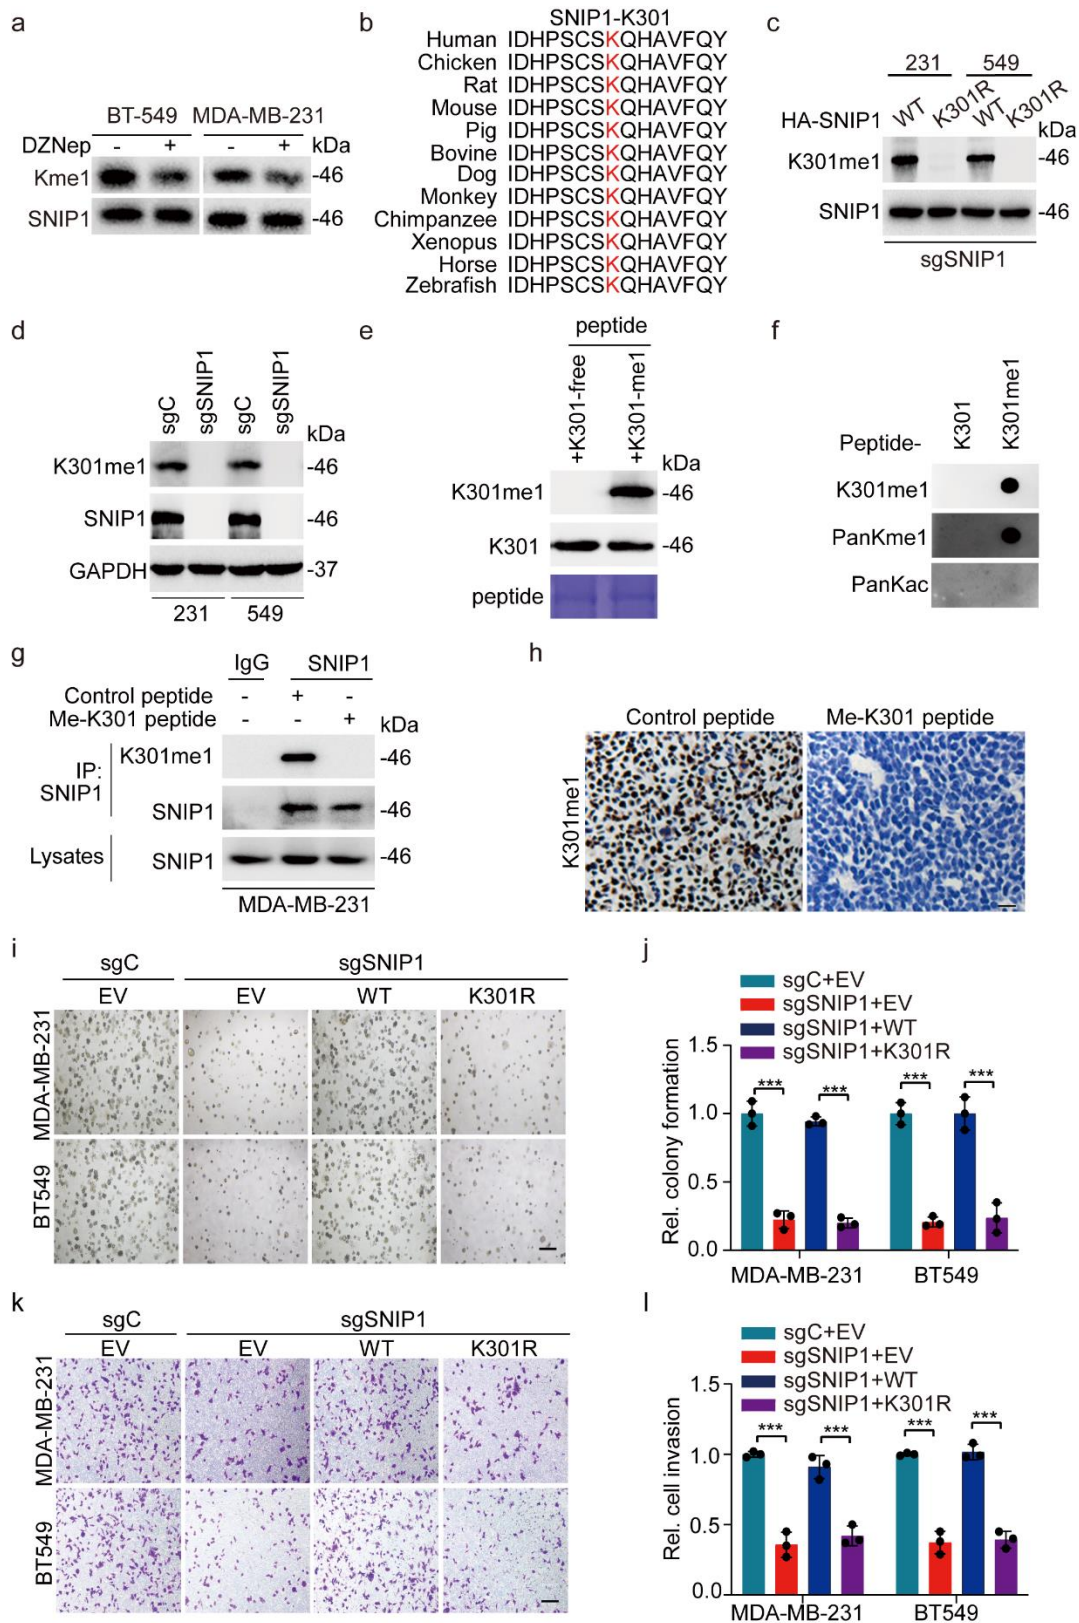

**Supplementary Fig. 1 SNIP1 methylation identification, and it promotes cells colony formation and invasion.**

**a**, Immunoblotting (IB) analysis of SNIP1 immunoprecipitates (IP) products and whole cell lysates (WCL) derived from MDA-MB-231 and BT-549 cells treated with/without methyltransferase inhibitors DZNep (5  $\mu$ M) 12 h before harvesting (n = 3).

**b**, Amino acid sequence alignment of SNIP1 among the indicated species showing Lys301, which is highlighted in red.

**c**, IB analysis of WCL derived from sgSNIP1 MDA-MB-231 and BT-549 cells infected with indicated SNIP1<sup>WT</sup> or SNIP1<sup>K301R</sup> and selected with hygromycin (200  $\mu$ g/ml) for 72 h before collection. A rabbit anti-SNIP1-K301me1 antibody was generated against a specific methyl-peptide containing me-K301 (n = 3).

**d**, IB analysis of K301me1 and SNIP1 in wild type and SNIP1 knockout MDA-MB-231 and BT549 cells, as indicated (n = 3).

**e** and **f**, IB (**e**) and dot blot analysis (**f**) of SNIP1 K301 mono-methylation antibody with using K301 unmodified (K301-free) and K301 monomethylated (K301-me1) peptides.

**e**, Top panel, IB analysis; lower panel, Coomassie brilliant blue staining. **f**, Dot blot analysis of K301me1, mono-methyllysine and pan-Kme1 for the peptide containing methylated K301 (n = 3).

**g**, IP and WB for SNIP1 methylation in MDA-MB-231 cells. Before IP, agarose beads were pre-incubated with a control peptide or the specific methyl-peptide containing me-K301 (n = 3).

**h**, Immunohistochemistry (IHC) assays of a clinical breast cancer tissue with the specific anti-SNIP1-K301me1 antibody in the presence of a control peptide or the specific methyl-peptide containing me-K301. IHC was performed twice on the breast cancer sample with the blocking peptide with similar results. Scale bar, 50 $\mu$ m (n = 3).

**i** and **j**, Cells derived from MDA-MB-231/sgSNIP1 cells re-expressed with indicated SNIP1-WT or SNIP1-K301R and selected with hygromycin (200  $\mu$ g/ml) for 72 h before collection were subjected to colony-formation assay (**i**). Representative images are shown in **i**, and relative colony numbers are plotted in **j**. Scale bars, 250  $\mu$ m (n = 3).

**k** and **l**, Cells generated in **i** were subjected to transwell assays (**k**) (n = 3). Representative images are shown in **k**, and relative invasion numbers are calculated in **l**. Scale bars, 50  $\mu$ m.

Data information: In (**j**, **l**), data are expressed as the mean  $\pm$  SD. \*\*\**P* <0.001, by two-tailed t-test. Panels (**a**, **c-l**) show 1 representative of 3 independent experiments with similar results.

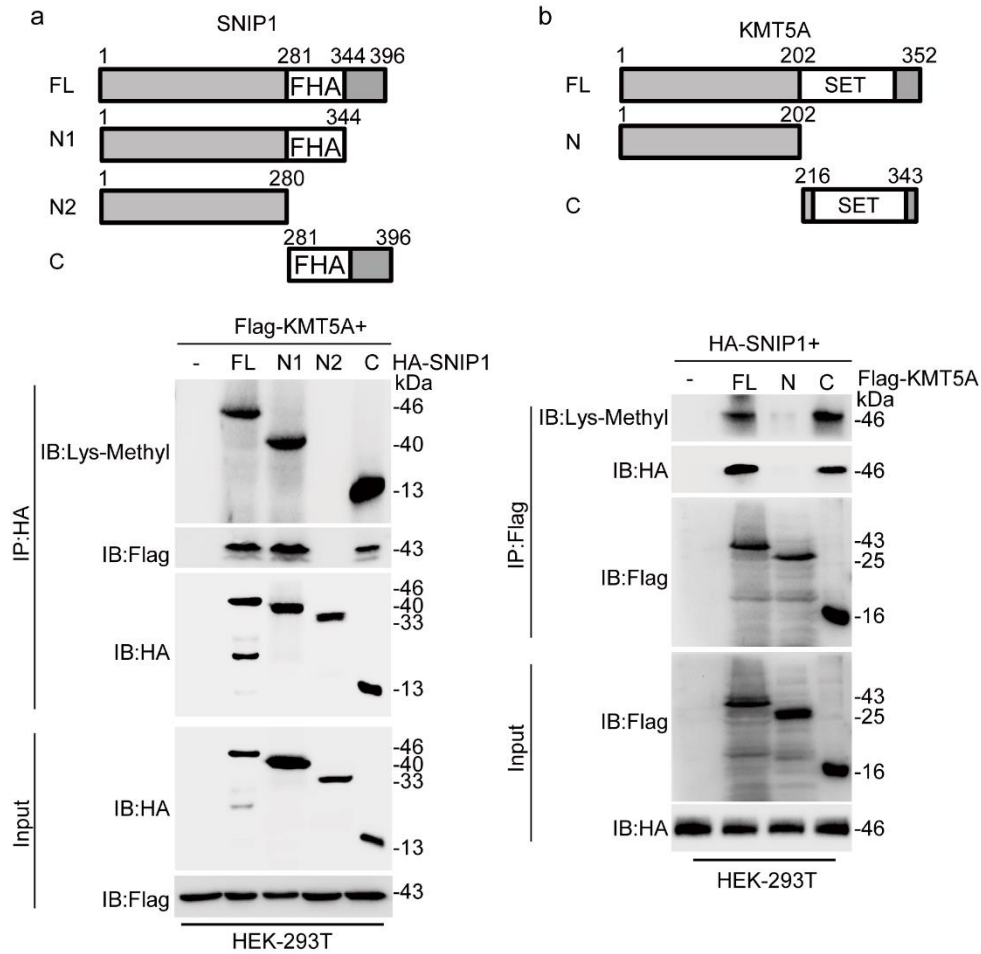

**Supplementary Fig. 2 KMT5A interacts with SNIP1 directly.**

**a**, Upper, schematics of SNIP1 full length (FL, 1-396aa), N1 (N-terminal, 1-344aa, contain FHA domain) mutant, N2 (N-terminal, 1-280aa) mutant, and C (C-terminal, 281-396aa, contain FHA domain) mutant plasmids; bottom, IB detection of SNIP1 methylation was immunoprecipitated with anti-HA magnetic beads in HEK-293T cells transfected with the Flag-KMT5A and HA-SNIP1 constructs (n = 3).

**b**, Upper, schematics of KMT5A full length (FL, 1-352aa), N (N-terminal, 1-202aa) mutant, and C (C-terminal, 216-343aa, contain SET domain) mutant plasmids; bottom, IB detection of SNIP1 methylation was immunoprecipitated with anti-Flag M2 beads in HEK-293T cells transfected with the HA-SNIP1 and Flag-KMT5A constructs (n = 3).

Data information: Panels (a) and (b) show 1 representative of 3 independent experiments with similar results.

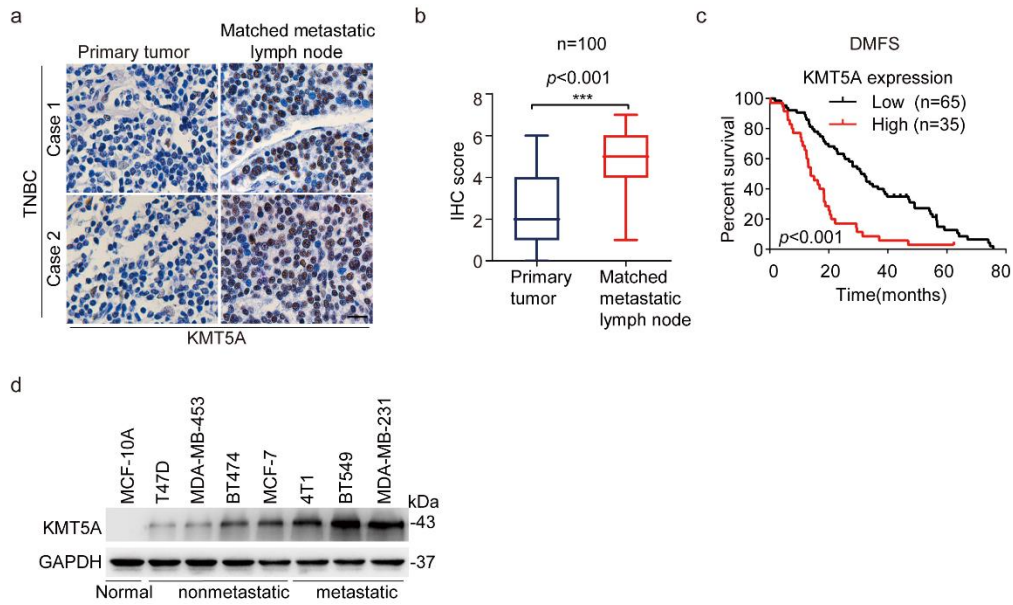

**Supplementary Fig. 3 KMT5A is associated with triple negative breast cancer metastasis.**

**a**, Representative IHC staining of KMT5A in primary TNBC and matched metastatic lymph nodes. Scale bars: 50  $\mu$ m.

**b**, Quantitative analysis of KMT5A IHC scores in (a) (n=100 paired samples). All Box and whisker plots represent the median (central line), 25th-75th percentile (bounds of the box) and 5th-95th percentile (whiskers).

**c**, High expression of KMT5A protein in primary TNBC tumor tissues associated with poor distance metastasis free survival (DMFS) in our cohort (n= 100).

**d**, IB analysis of KMT5A in the normal breast epithelium cell line and breast cancer cell lines with different metastatic ability (n = 3).

Data information: In (b), data are presented as mean  $\pm$  SEM, \*\*\* $P$ <0.001, by two-tailed t-test. In (c), statistical analysis was performed by log-rank test,  $P$  < 0.001. Panel (d) shows 1 representative of 3 independent experiments with similar results.

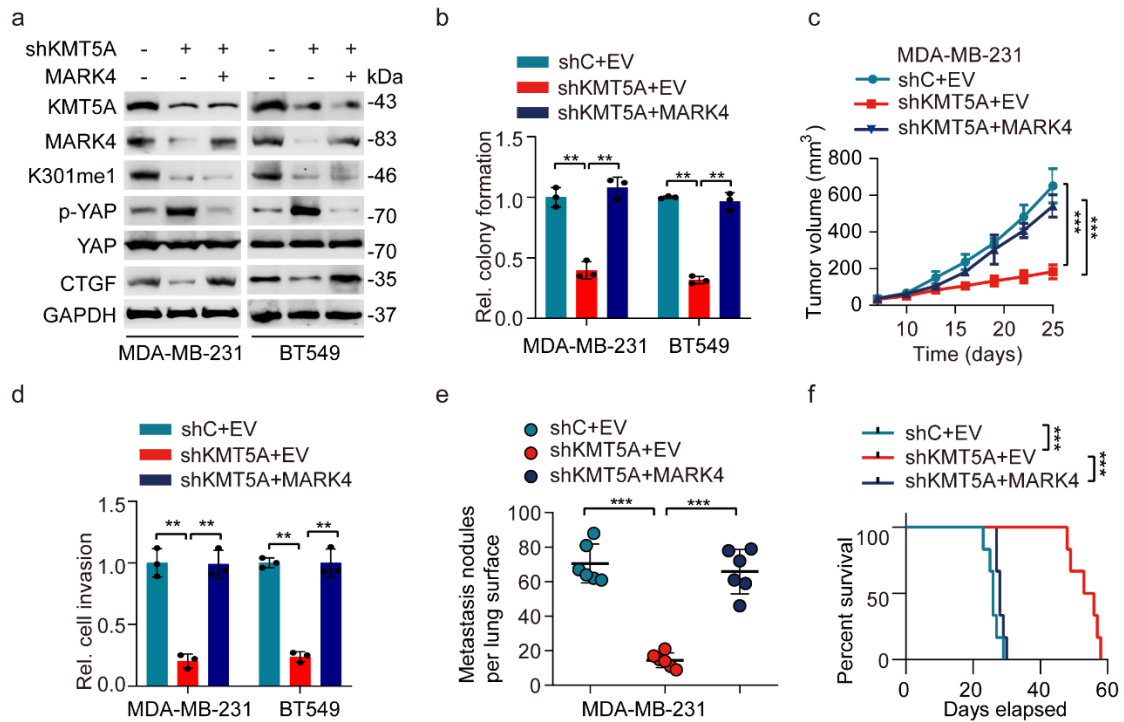

**Supplementary Fig. 4 KMT5A mediated-SNIP1 methylation to activate Hippo/YAP signaling, cell proliferation and invasion through regulating MARK4.**

**a**, IB analysis of ectopic expression of KMT5A combined with MARK4 knockdown on Hippo signaling activation in MDA-MB-231 and BT549 cells (n = 3).

**b**, Cells generated in **a** were subjected to colony-formation assay and relative colony numbers are plotted (n = 3).

**c**, Cells generated in **a** were subjected to mouse xenograft assays by orthotopic injection in athymic nude mice, and tumor sizes were monitored and analyzed (n = 6 mice per group).

**d**, Cells generated in **a** were subjected to transwell assays and relative invasion numbers are calculated (n = 3).

**e-f**, Effects of ectopic expression of MARK4 combined with KMT5A knockdown on cell lung metastasis (**e**), and mouse lifespan (**f**), which these cells generated in **a** were implanted into the lateral tail vein of athymic nude mice (n=6 mice per group).

Data information: In (**b-f**), statistical analysis was performed by two-tailed t-test. In (**f**), by log-rank test. Error bars  $\pm$  S.E.M.  $**P < 0.01$ ,  $***P < 0.001$ . Panels (**a**, **b**, **d**) show 1 representative of 3 independent experiments with similar results. Panels (**c**, **e**, **f**) show 1 representative of 2 independent experiments with similar results.

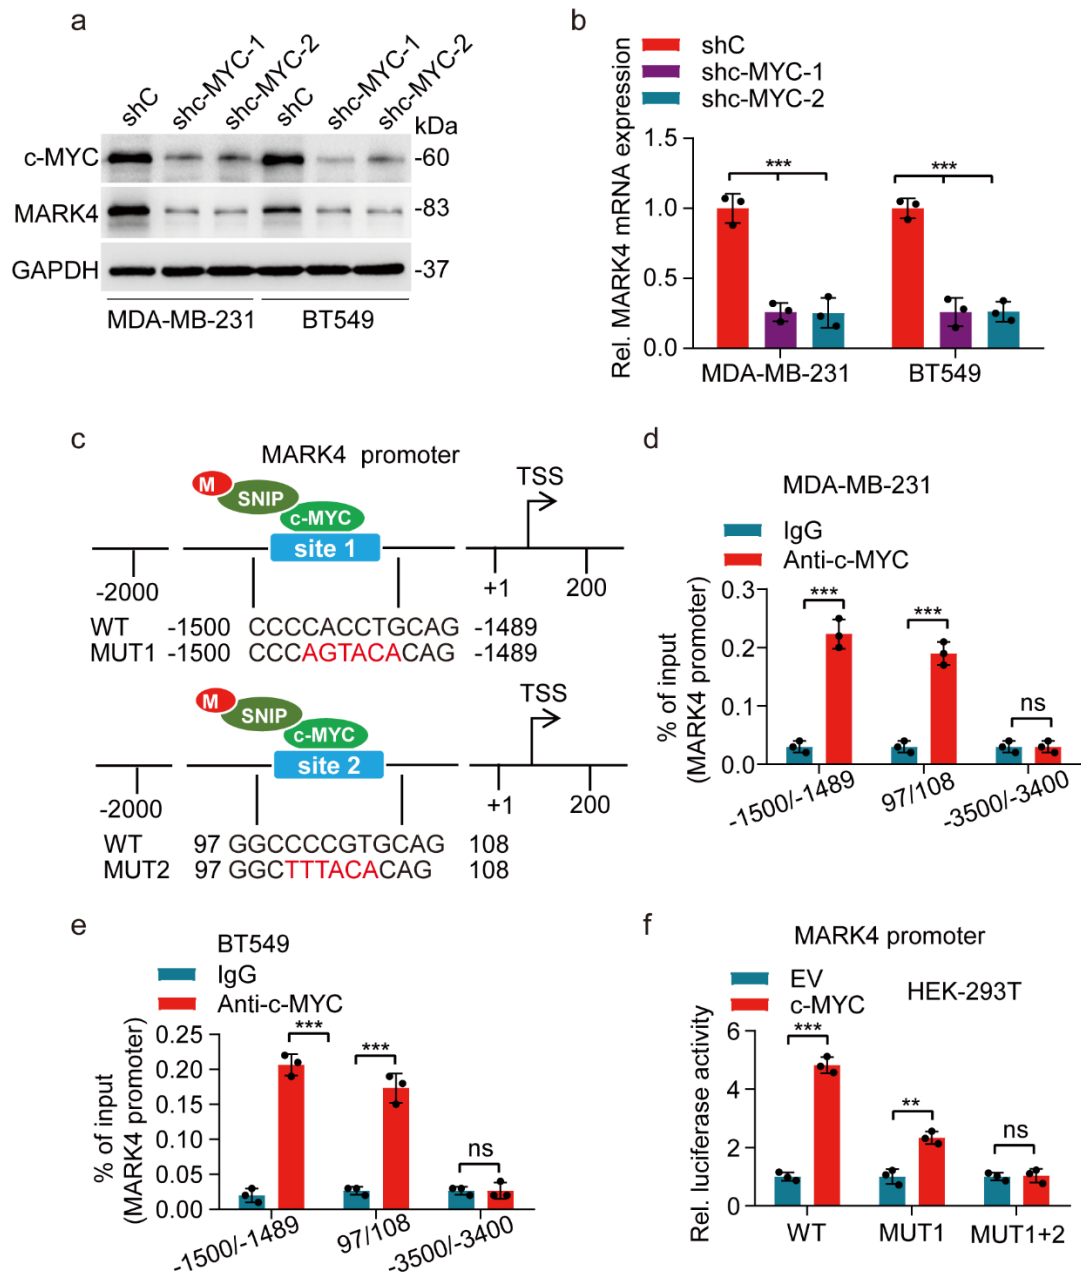

**Supplementary Fig. 5 c-MYC regulates MARK4 transcription.**

**a**, c-MYC knockdown impaired MARK4 expression in MDA-MB-231 and BT549 cells (n = 3).

**b**, qRT-PCR analysis of the effect of c-MYC knockdown on MARK4 expression in MDA-MB-231 and BT549 cells (n = 3).

**c**, Schematic diagram of putative c-MYC-binding sites in MARK4 promoter.

**d** and **e**, CHIP-qPCR analysis of the binding of c-MYC with MARK4 promoter in MDA-MB-231 (**d**) and BT549 (**e**) cells. An anti-IgG or anti-c-MYC antibody was used (n = 3).

**f**, Luciferase activity in HEK-293T cells co-transfected with c-MYC and luciferase reporters containing MARK4 promoter WT, mutants, or empty vector (EV) (n = 3).

Data information: In (**b-f**), data are expressed as the mean  $\pm$  SD.  $**P < 0.01$ ,  $***P < 0.001$ , by two-tailed t-test. Panels (**a**, **b**, **d-f**) show 1 representative of 3 independent experiments with similar results.

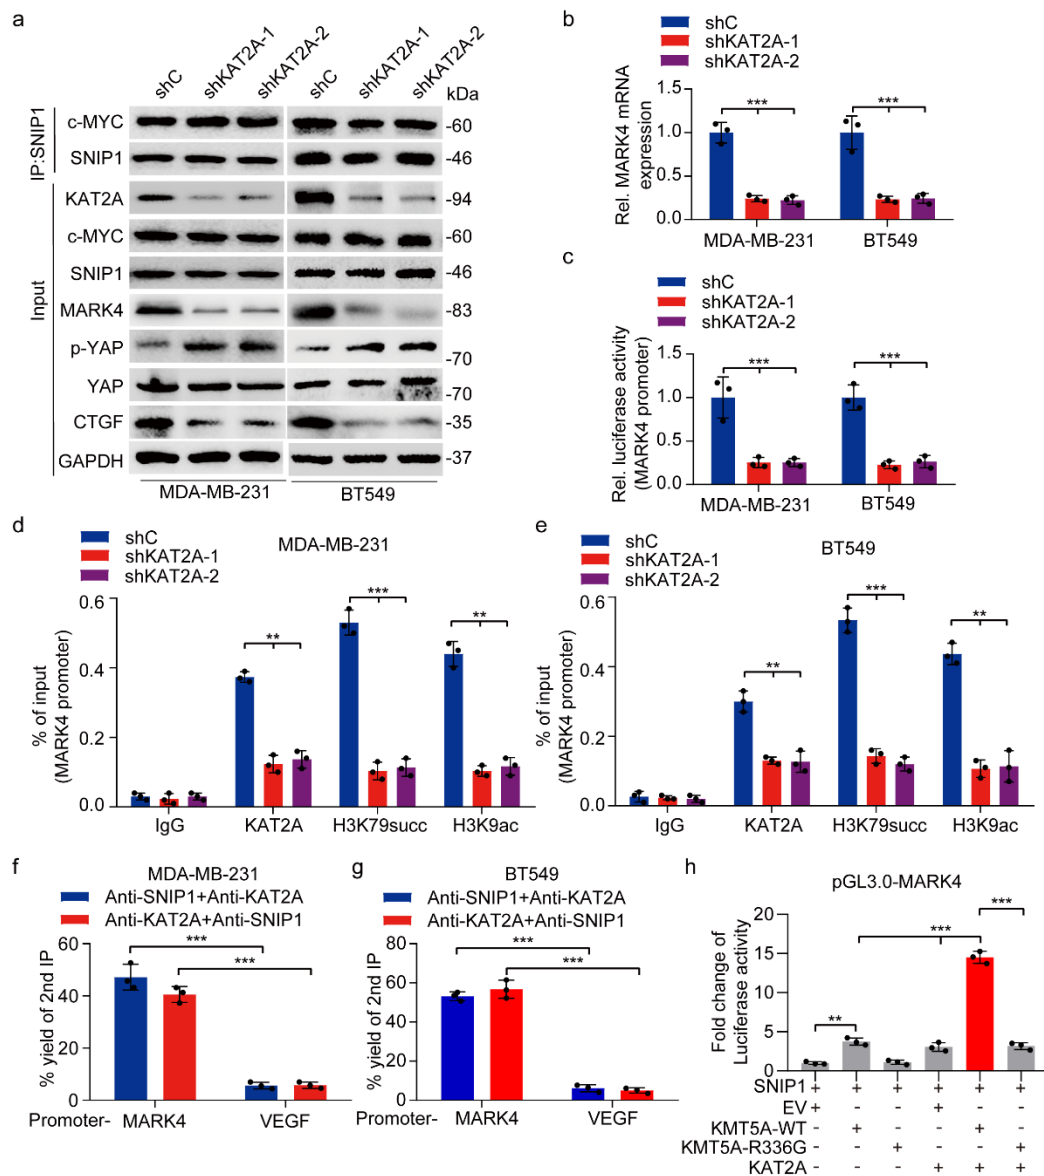

**Supplementary Fig. 6 KMT5A-mediated SNIP1 methylation interacts with KAT2A to activate MARK4 transcription.**

**a**, Immunoprecipitation and western blotting for KAT2A knockdown on SNIP1 binding with c-MYC protein, MARK4 expression and YAP signaling activation (n = 3).

**b**, MARK4 mRNA expression in KAT2A knockdown cells. Nontargeting shRNA (shC), KAT2A knockdown (shKAT2A-1 and shKAT2A-2) (n = 3).

**c**, Luciferase activity of MARK4 promoter in KAT2A knockdown cells in **b** (n = 3).

**d** and **e**, ChIP-qPCR results showing decreased KAT2A, H3K79succ and H3K9ac levels at the MARK4 promoter after KAT2A silencing in MDA-MB-231 (**d**) and BT549 (**e**) cells (n = 3).

**f** and **g**, Sequential ChIP-qPCR for analyzing the co-occupancy of SNIP1 and KAT2A on the promoter of MARK4 and VEGF in MDA-MB-231 (**f**) and BT549 (**g**) cells. Data represent yields of secondary immunoprecipitation (n = 3).

**h**, Luciferase (luc) reporter assay. The HEK-293T cells were co-transfected with the reporter plasmid containing MARK4 (pGL3.0-MARK4) promoter and different expression vectors as indicated (n = 3).

Data information: In (**b-h**), data are expressed as the mean  $\pm$  SD. \*\*P < 0.01, \*\*\*P < 0.001, by two-tailed t-test. Panels (**a-h**) show 1 representative of 3 independent experiments with similar results.

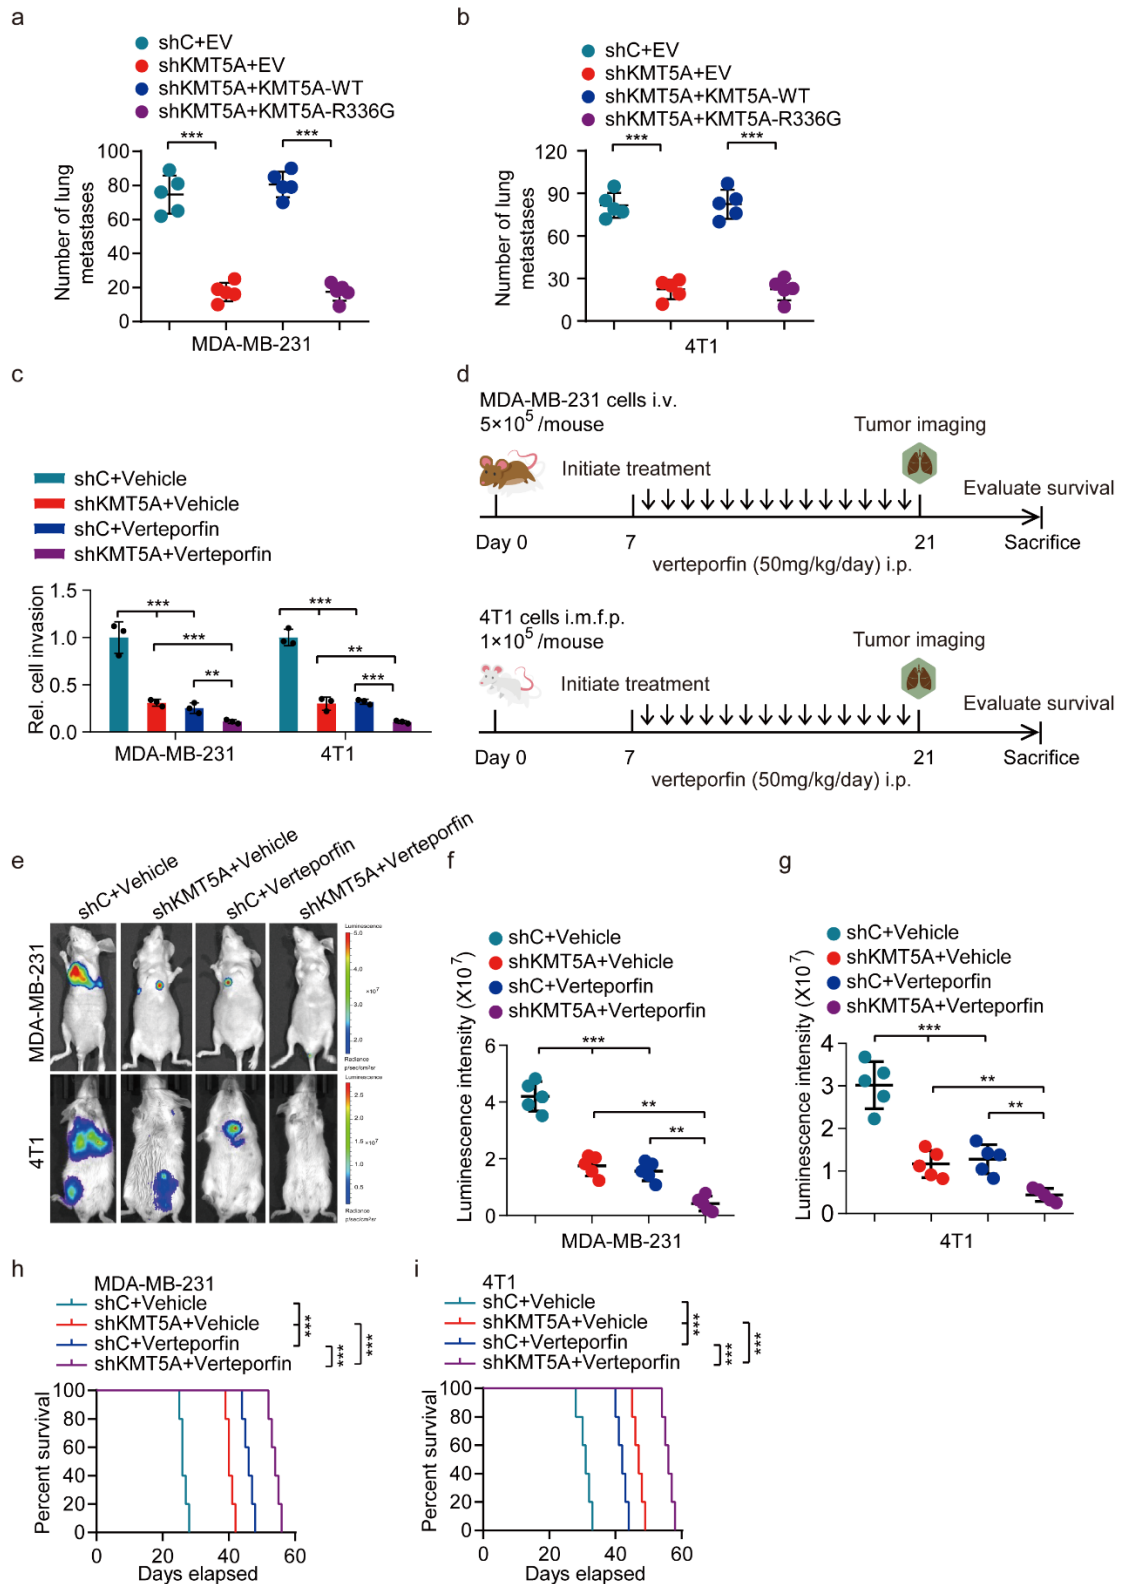

**Supplementary Fig. 7 KMT5A catalytic activity depletion combined with YAP signaling inhibition impedes triple-negative breast cancer progression.**

**a** and **b**, Scatter blot showing lung metastatic nodules for MDA-MB-231 (**a**) and 4T1 (**b**) xenografts modified to express shRNA KMT5A or shRNA control and re-expressing shRNA resistant KMT5A<sup>WT</sup> or catalytically deficient KMT5A<sup>R336G</sup> in mice (n = 5 mice for each group). Nontargeting shRNA (shC). Empty vector (EV).



**c**, Invasion analysis of MDA-MB-231 and 4T1 cell lines depleted for KMT5A or control. Cells were treated with verteporfin (10  $\mu$ M) or placebo (vehicle) as indicated (n = 3).

**d**, Treatment schedules for the administration of verteporfin (50 mg/kg, intraperitoneal injection once daily) to mice grafted with MDA-MB-231 cells (upper) or 4T1 cells (lower). Control mice received placebo (vehicle). Intravenous injection (i.v.). Orthotopic mammary fat pad injection (i.m.f.p.). Intraperitoneal injection (i.p.). (n = 5 mice per group).

**e**, Representative bioluminescence images in **d** on day 21.

**f** and **g**, Quantification of the bioluminescence activity of MDA-MB-231 (**f**) and 4T1 (**g**) tumor xenografts from verteporfin treated and control mice in (**e**). (n = 5 mice per group).

**h** and **i**, Kaplan-Meier survival analysis of mice with MDA-MB-231 (**h**) and 4T1 (**i**) tumor xenografts (n = 5 mice per group).

Data information: In (**a** and **b**), statistical analysis was performed by two-tailed t-test. In (**c**, **f** and **g**), by two-tailed Student's t-test or one-way ANOVA. In (**h** and **i**), by log-rank test. \*\*\* $P < 0.001$ , \*\* $P < 0.01$ . Data are represented as mean  $\pm$  S.E.M. Panels (**a-c**, **e-i**) show 1 representative of 3 independent experiments with similar results.

**Supplementary Table 1** Primers for qRT-PCR assays and CHIP-qPCR assays.

| Primer pairs            | Sequence                                                            |
|-------------------------|---------------------------------------------------------------------|
| qRT-PCR, GAPDH          | 5'-GGAGCGAGATCCCTCCAAAAT-3' and<br>5'-GGCTGTTGTCATACTTCTCATGG-3'    |
| qRT-PCR, DAB2           | 5'-GTAGAAACAAGTGCAACCAATGG-3' and<br>5'-GCCTTTGAACCTTGCTAAGAGA-3'   |
| qRT-PCR, CDC20          | 5'-GCACAGTTCGCGTTCGAGA-3' and<br>5'-CTGGATTTGCCAGGAGTTCGG-3'        |
| qRT-PCR, HMMR           | 5'-ATGATGGCTAAGCAAGAAGGC-3' and<br>5'-TTTCCCTTGAGACTCTTCGAGA-3'     |
| qRT-PCR, TK1            | 5'-GGGCAGATCCAGGTGATTCTC-3' and<br>5'-TGTAGCGAGTGTCTTTGGCATA-3'     |
| qRT-PCR, ECT2           | 5'-ACTACTGGGAGGACTAGCTTG-3' and<br>5'-CACTCTTGTTTTCAATCTGAGGCA-3'   |
| qRT-PCR, SH2D4A         | 5'-CTGGAGCAAGGATCGAGGC-3' and<br>5'-CAGCTCTTACAAATCTGCTTCGT-3'      |
| qRT-PCR, TSPAN3         | 5'-GAGTGTCCCTCTTAGCTGCTG-3' and<br>5'-AGCTTCTTCACTACTAGAGCCTC-3'    |
| qRT-PCR, CRIM1          | 5'-CCCTGTGACGAGTCCAAGTG-3' and<br>5'-GGTTCCGTAAATCCCGAAGGT-3'       |
| qRT-PCR, DCL1           | 5'-TGGAGCGGACATGATAAGCAT-3' and<br>5'-AGCACAGGTGTCAACTAAATCC-3'     |
| qRT-PCR, AXL            | 5'-GTGGGCAACCCAGGGAATATC-3' and<br>5'-GTACTGTCCCGTGTCCGAAAG-3'      |
| qRT-PCR, SLIT2          | 5'-GCGAAGCTATACAGGCTTGAT-3' and<br>5'-TGCAGTCGAAAAGTCCTAAGTTT-3'    |
| qRT-PCR, LHFP           | 5'-CTCCTGCGTGGGGTTCTTTAT-3' and<br>5'-CCGGTCACTATGGTGCAGAT-3'       |
| qRT-PCR, CENPF          | 5'-CTCTCCCGTCAACAGCGTTC-3' and<br>5'-GTTGTGCATATTCTTGGCTTGC-3'      |
| qRT-PCR, FLNA           | 5'-CTTATCGCGCTGTTGGAGGT-3' and<br>5'-GCCACCGACACGTTCTCAA-3'         |
| qRT-PCR, NDRG1          | 5'-CTCCTGCAAGAGTTTGATGTCC-3' and<br>5'-TCATGCCGATGTCATGGTAGG-3'     |
| qRT-PCR, YAP            | 5'-TAGCCCTGCGTAGCCAGTTA-3' and<br>5'-TCATGCTTAGTCCACTGTCTGT-3'      |
| qRT-PCR, CTGF           | 5'-CAGCATGGACGTTTCGTCTG-3' and<br>5'-AACCACGGTTTGGTCCTTGG-3'        |
| qRT-PCR, CYR61          | 5'-CTCGCCTTAGTCGTCACCC-3' and<br>5'-CGCCGAAGTTGCATTCCAG-3'          |
| qRT-PCR, HIF-1 $\alpha$ | 5'-GAACGTGCGAAAAGAAAAGTCTCG-3' and<br>5'-CCTTATCAAGATGCGAACTCACA-3' |
| qRT-PCR, VEGF           | 5'-AGGGCAGAATCATCACGAAGT-3' and<br>5'-AGGGTCTCGATTGGATGGCA-3'       |

|                                                |                                                                  |
|------------------------------------------------|------------------------------------------------------------------|
| qRT-PCR, JAK-1                                 | 5'-CTTTGCCCTGTATGACGAGAAC-3' and<br>5'-ACCTCATCCGGTAGTGGAGC-3'   |
| qRT-PCR, JAK-2                                 | 5'-TCTGGGGAGTATGTTGCAGAA-3' and<br>5'-AGACATGGTTGGGTGGATACC-3'   |
| qRT-PCR, JAK-3                                 | 5'-TTCGGGCTACGCAAGGATTTG-3' and<br>5'-AGGCTGAGACACTCACCCCT-3'    |
| qRT-PCR, STAT3                                 | 5'-CAGCAGCTTGACACACGGTA-3' and<br>5'-AAACACCAAAGTGGCATGTGA-3'    |
| qRT-PCR, PIK3CA                                | 5'-CCACGACCATCATCAGGTGAA-3' and<br>5'-CCTCACGGAGGCATTCTAAAGT-3'  |
| qRT-PCR, AKT                                   | 5'-AGCGACGTGGCTATTGTGAAG-3' and<br>5'-GCCATCATTCTTGAGGAGGAAGT-3' |
| qRT-PCR, SNIP1                                 | 5'-TGAAGCAGGAGCGTCTCAG-3' and<br>5'-TCGGTTTCTCTTACTGCGAGG-3'     |
| qRT-PCR, MARK4                                 | 5'-AGGTTGCCATCAAGATTATCGAC-3' and<br>5'-GATGCGGACTTCTCGGAACAG-3' |
| ChIP-qPCR,<br>MARK4 promoter<br>-50 to 150     | 5'-TTCGTGTCTCTCTATCTCTA-3' and<br>5'-AAAAGCTGGGCGCCGAGAA-3'      |
| ChIP-qPCR,<br>MARK4 promoter<br>-1550 to -1350 | 5'-GCAGTGAGACCCTGTCTCAA-3' and<br>5'-TCTGTGATCTTGAGGTTACC-3'     |
