# Supplementary material for: KMT5A-methylated SNIP1 promotes triple-negative breast cancer metastasis by activating YAP signaling
Source: PubMed Central journal article supplement (PMC9023492; doi:10.1038/s41467-022-29899-w), 2022-04-21
Supplement: 41467_2022_29899_MOESM2_ESM.pdf [file 41467_2022_29899_MOESM2_ESM.pdf]

**Description of Additional Supplementary Files**  
**KMT5A-methylated SNIP1 promotes breast cancer metastasis by activating YAP signalling**

Bo Yu, Jun Su, Qiqi Shi, Qing Liu, Jun Ma, Guoqing Ru, Lei Zhang, Jian Zhang, Xichun Hu, Jianming Tang

Figure S1-S7

Table S1
